# Supplementary material for: A Characterization of the Effects of Minocycline Treatment During Adolescence on Structural, Metabolic, and Oxidative Stress Parameters in a Maternal Immune Stimulation Model of Neurodevelopmental Brain Disorders
Source: PubMed Central journal article supplement — Int J Neuropsychopharmacol. 2021 Jun 24;24(9):734–48. doi: 10.1093/ijnp/pyab036 (PMC8453277; doi:10.1093/ijnp/pyab036), 2021-06-24
Supplement: pyab036_suppl_supplementary_materials.pdf [file pyab036_suppl_supplementary_materials.pdf]

## A. VBM analysis

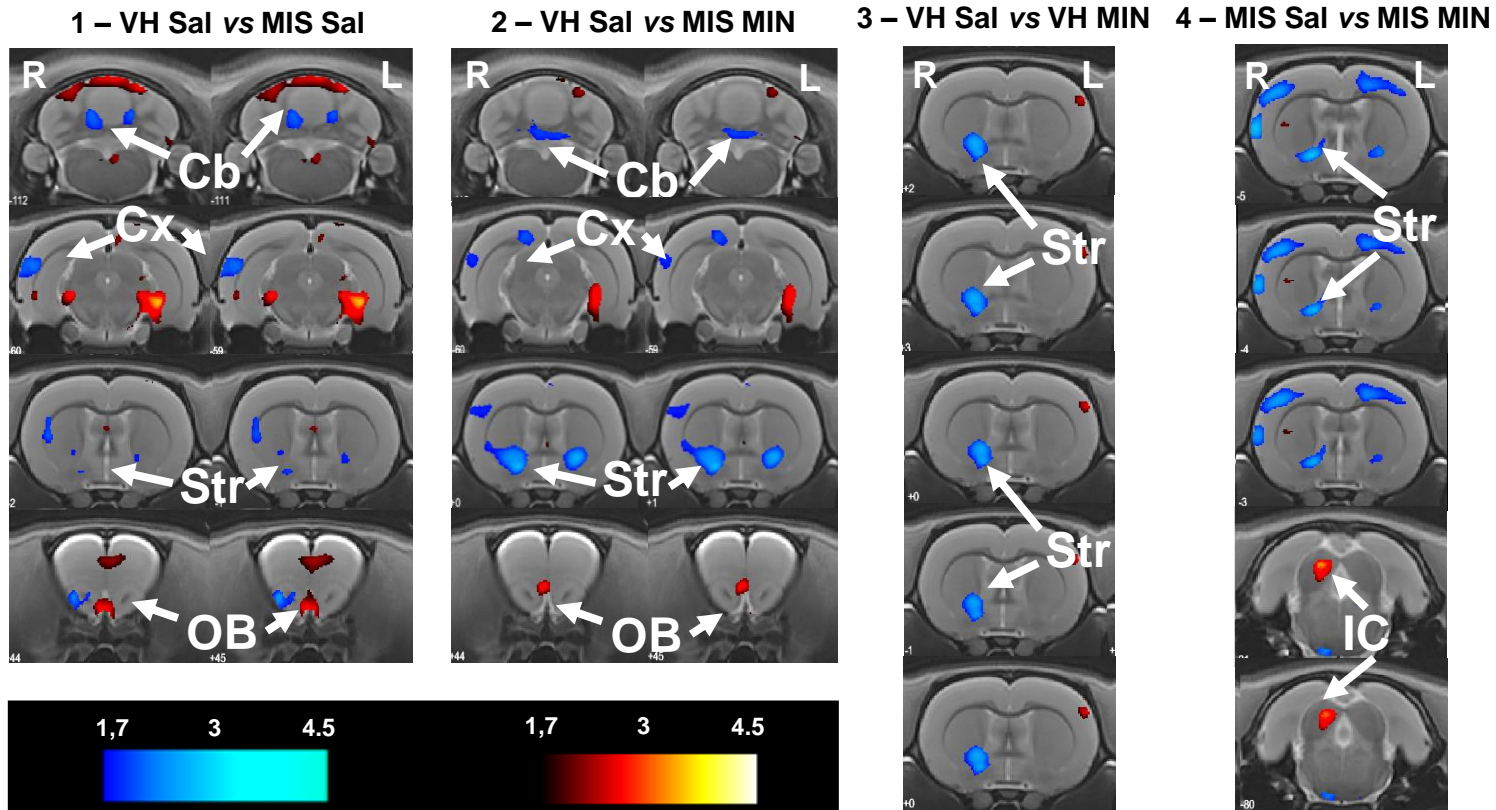

## B. PET analysis

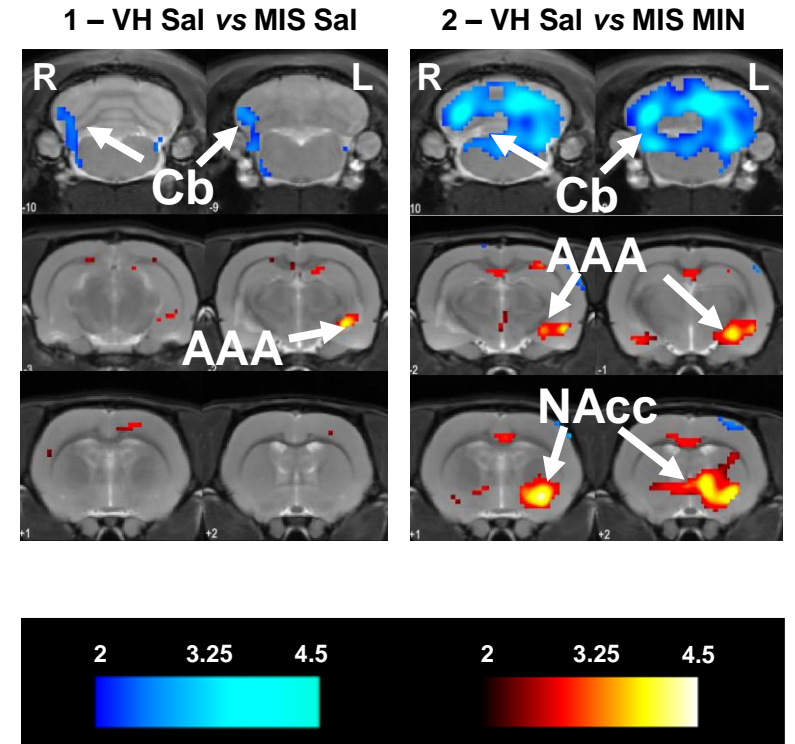

**Supplementary figure 1. A) VBM results in gray matter ( $p < 0.05$ ).** VBM results in T-maps overlaid on the T2-MR template, showing the MIS effect in Sal animals (pathology, A1), together with the comparison between untreated VH animals and MIN-treated MIS animals (A2), and the pharmacological effect of MIN in VH (A3) and MIS animals (A4). The color bars represent the T-values corresponding to gray matter enlargements (warm) and shrinkages (cold) ( $k > 1000$  voxels). **B) Voxel-based FDG-PET results ( $p < 0.05$ ).** PET results in T-maps overlaid on a T2-MR image used as template, showing the MIS effect in Sal animals (B1), as well as the comparison between untreated VH animals and MIN-treated MIS animals (B2), on glucose metabolism. The color bars represent the T-values corresponding to reduced (cold) and increased (warm) FDG uptake ( $k > 50$  voxels).
